# Supplementary material for: Dietary l-leucine and l-alanine supplementation have similar acute effects in the prevention of high-fat diet-induced obesity
Source: Springer Nature journal article supplement (doi:10.1007/s00726-012-1363-2), 2012-07-30
Supplement: MOESM1 [file 726_2012_1363_MOESM1_ESM.doc]

| **Suplemental table 1.** Postabsorptive plasma free amino acid concentrations of 10 weeks old male C57BL/6 mice fed semi-synthetic diets with an adequate (AP), a high (HP) or an adequate protein concentration supplemented with L-leucine (Leu) or equimolar L-alanine (Ala for 1 week1,2 | | | | | |
| --- | --- | --- | --- | --- | --- |
|  | **AP** | **Ala** | **Leu** | **HP** | **ANOVA** |
| *µmol/l* | | | | | |
| **Indispensable amino acids** | | | | | |
| Histidine | 57.5±3.7ab | 54.4±2.2a | 63.4±2.2b | 55.5±1.5ab | < 0.05 |
| Isoleucine | 63.1±3.7a | 61.5±3.7a | 72.0±4.2a | 87.0±7.3b | < 0.01 |
| Leucine | 118±7a | 116±6a | 144±6b | 156±13b | < 0.01 |
| Methionine | 48.1±5.0b | 42.8±2.4ab | 51.4±1.8b | 36.7±1.3a | < 0.01 |
| Phenylalanine | 61.1±2.9 | 57.6±3.1 | 67.3±3.2 | 66.9±4.0 | NS |
| Threonine | 144±14b | 114±6a | 124±8ab | 107±5a | < 0.05 |
| Valine | 147±6a | 141±7a | 157±11a | 194±13b | < 0.05 |
| Lysine | 248±23c | 206±15bc | 186±9b | 135±7a | < 0.001 |
| **Dispensable amino acids** | | | | | |
| Alanine | 363±28 | 336±16 | 357±24 | 327±15 | NS |
| Arginine | 89.4±11.5 | 76.0±8.0 | 82.6±4.9 | 69.0±6.4 | NS |
| Asparagine | 35.0±2.8 | 32.5±1.6 | 37.5±1.5 | 30.4±1.0 | NS |
| Aspartic acid | 15.0±1.9 | 14.2±1.3 | 14.7±1.2 | 13.7±1.5 | NS |
| Cysteine | 8.4±1.2 | 13.5±2.3 | 13.4±2.0 | 8.5±2.0 | NS |
| Glutamic acid | 77.8±18.7 | 61.8±8.5 | 71.5±7.8 | 59.4±16.0 | NS |
| Glutamine | 555±27a | 535±25a | 563±24a | 643±24b | < 0.05 |
| Glycine | 185±12 | 171±9 | 196±11 | 192±8 | NS |
| Proline | 63.9±5.4 | 56.3±2.2 | 67.4±2.7 | 55.6±3.6 | NS |
| Serine | 122±9 | 110±7 | 128±6 | 104±4 | NS |
| Tyrosine | 363±28 | 336±16 | 357±24 | 327±15 | NS |
| **Nonproteinogenic amino acids** | | | | | |
| Citrulline | 99.8±7.9 | 100.2±4.6 | 103.0±5.3 | 85.2±5.3 | NS |
| Ornithine | 47.8±2.8b | 39.9±3.9ac | 43.92.3bc | 32.2±1.2a | < 0.01 |
| Taurine | 782±191 | 567±69 | 541±41 | 634±99 | NS |
| 1 Values are means ± SEM, *n* = 7-8. Within a row, values without a common superscriptdiffer, *P* < 0.05; NS, not significant. 2 For diet composition see Table 1. | | | | | |
